# Supplementary material for: Pubertal assessment: targeted educational intervention for pediatric trainees
Source: publisher site journal article supplement (doi:10.1515/ijamh-2017-0064), 2017-08-18
Supplement: Supplementary file 1 [file Supl_1._Tanner_Stage_Card_.pdf › Supl_1._Tanner_Stage_Card_.pdf]

### Tanner Stages FEMALE

|         | Breast                                                                                               | Pubic Hair                                             |
|---------|------------------------------------------------------------------------------------------------------|--------------------------------------------------------|
| Stage 1 | No palpable breast tissue                                                                            | No pubic hair                                          |
| Stage 2 | Palpable breast bud, elevation of papilla, areolar enlargement                                       | Sparse, straight hair along lateral vulva              |
| Stage 3 | Breast enlargement, no separation of areolar contour from breast                                     | Darker, coarser, curlier hair extending over mid-pubis |
| Stage 4 | Areola and papilla project above breast forming a secondary mound                                    | Adult-like hair, forms triangle over mid-pubis         |
| Stage 5 | Recession of areola to match contour of breast; papilla projects beyond contour of areola and breast | Adult type hair, extending to both thighs              |

Harriet Lane Handbook Twentieth Edition

### Tanner Stages MALE

|         | Penis and Testes                                                                               | Pubic Hair                                                 |
|---------|------------------------------------------------------------------------------------------------|------------------------------------------------------------|
| Stage 1 | Testes < 4ml volume or <2.5 cm length, penis prepubertal                                       | No pubic hair                                              |
| Stage 2 | Testes 4ml or 2.5, penis not enlarged                                                          | Sparse, straight hair along base of penis                  |
| Stage 3 | Further growth of testes & scrotum, enlargement and lengthening of penis                       | Darker, coarser, curlier hair extending over the mid-pubis |
| Stage 4 | Testes and scrotum further enlarged, increased size and breadth of penis, development of glans | Adult-like, forms triangle over mid-pubis                  |
| Stage 5 | Testes fully mature in shape and size, adult size penis                                        | Adult type hair, extending to both thighs                  |

Harriet Lane Handbook Twentieth Edition  
 Variations in the Pattern of Pubertal Changes in Boys, Marshall & Tanner  
 Archives of Disease in Childhood, 1970
