# Supplementary material for: Pubertal assessment: targeted educational intervention for pediatric trainees
Source: publisher site journal article supplement (doi:10.1515/ijamh-2017-0064), 2017-08-18
Supplement: Supplementary file 2 [file Supl_3._Study_Questionnaire_.pdf › Supl_3._Study_Questionnaire_.pdf]

## APPENDIX A Study Questionnaire

### Demographics:

1. PGY level -
  - a. PGY 1
  - b. PGY 2
  - c. PGY 3
  - d. PGY 4
2. Gender
  - a. Male
  - b. Female
3. Did you graduate from a medical school within the United States of America?
  - a. Yes
  - b. No
4. Have you done a Pediatrics Endocrinology rotation so far in your residency?
  - a. Yes
  - b. No

### Attitude:

5. Do you feel it is important to assess/assign Tanner staging in pediatric patients?
  - a. Yes
  - b. No
6. Do you feel confident in assessing/assigning Tanner staging in your patients?
  - a. Yes
  - b. No
7. Do you feel comfortable assessing the need for referral to an endocrinologist based on abnormal findings in the Tanner Stages?
  - a. Yes
  - b. No
8. For **male residents**- how comfortable do you feel performing a breast and genitalia exam on adolescent female patients?
  - a. Comfortable
  - b. Not comfortable

c. N/A

9. For **female residents**-how comfortable do you feel performing a genitalia exam on adolescent male patients?
- a. Comfortable
  - b. Not comfortable
  - c. N/A

**Practice:**

10. How often do you perform genitalia exam on pediatric patients **during regular visits** in your clinic?
- a. Always
  - b. Most of the times
  - c. Sometimes
  - d. Never

11. How often do you perform genitalia exam on pediatric patients **during sick visits** in your clinic?
- a. Always
  - b. Most of the times
  - c. Sometimes
  - d. Never

12. How often do you **assess/assign Tanner staging** on your pediatric patients during each patient encounter?
- a. Always
  - b. Most of the times
  - c. Sometimes
  - d. Never

13. How many times in past one year have you referred a patient from your clinic to Pediatric Endocrinology due to puberty related issues (precocious or delayed)?
- a. None
  - b. 1-3 times
  - c. > 3 times

**Knowledge:**

14. What is the first objective physical sign of puberty in males?
- a) Growth spurt
  - b) Pubic Hair growth
  - c) Testicular enlargement
  - d) Penile lengthening
15. What is the first objective physical sign of puberty in females?
- a) Growth Spurt
  - b) Pubic Hair growth
  - c) Breast development
  - d) Menarche
16. What Tanner stage is associated with the onset of puberty?
- a. Tanner 1
  - b. Tanner 2
  - c. Tanner 3
  - d. Tanner 4
  - e. Tanner 5

In a 6-year old boy on physical exam you find dark, curled, coarse pubic hair spread over the mons pubis and extending to the medial thighs.

17. What is his pubic hair Tanner stage?
- a. Tanner 1
  - b. Tanner 2
  - c. Tanner 3
  - d. Tanner 4
  - e. Tanner 5
18. Are you concerned about his pubertal development?
- a. Yes
  - b. No

In a 6-months old Full Term female on physical exam you find bilateral breast buds

19. What is her breast Tanner stage?
- a. Tanner 1
  - b. Tanner 2
  - c. Tanner 3

- d. Tanner 4
  - e. Tanner 5
20. Are you concerned about her breast development?
- a. Yes
  - b. No

In a 6 year old female on physical examination you notice bilateral breast buds with enlargement of breast and areola but no separation of areola from breast.

21. What is patient's Tanner stage?
- a. Tanner 1
  - b. Tanner 2
  - c. Tanner 3
  - d. Tanner 4
  - e. Tanner 5
22. Are you concerned about her pubertal development?
- a. Yes
  - b. No
23. Of the interventions performed in this study, which one did you find the most useful?
- a. Lectures by the Endocrinology Fellow
  - b. Tanner Staging Flashcards with the ID tag
  - c. Posters explaining Tanner Staging placed in continuity clinics
24. What according to you is the most important barrier in the practice of Tanner Staging ?
- Use numbers against options from 1- 5, with 1 being the least important and 5 being the most important
- a. Feel uncomfortable explaining and performing Tanner Staging
  - b. Non consenting parents/uncomfortable parents
  - c. Patient discomfort/refusal
  - d. Poor knowledge of what to look for and identifying abnormalities if any
  - e. Lack of time in a patient encounter
